# Supplementary material
Source: PubMed Central journal article supplement (PMC7451942)
Supplement: mmc1.pdf [file mmc1.pdf]

**Biophysical Journal, Volume 119**

**Supplemental Information**

**Tautomeric Effect of Histidine on  $\beta$ -Sheet Formation of Amyloid Beta 1–40: 2D-IR Simulations**

**Yeonsig Nam, Mahroof Kalathingal, Shinji Saito, and Jin Yong Lee**

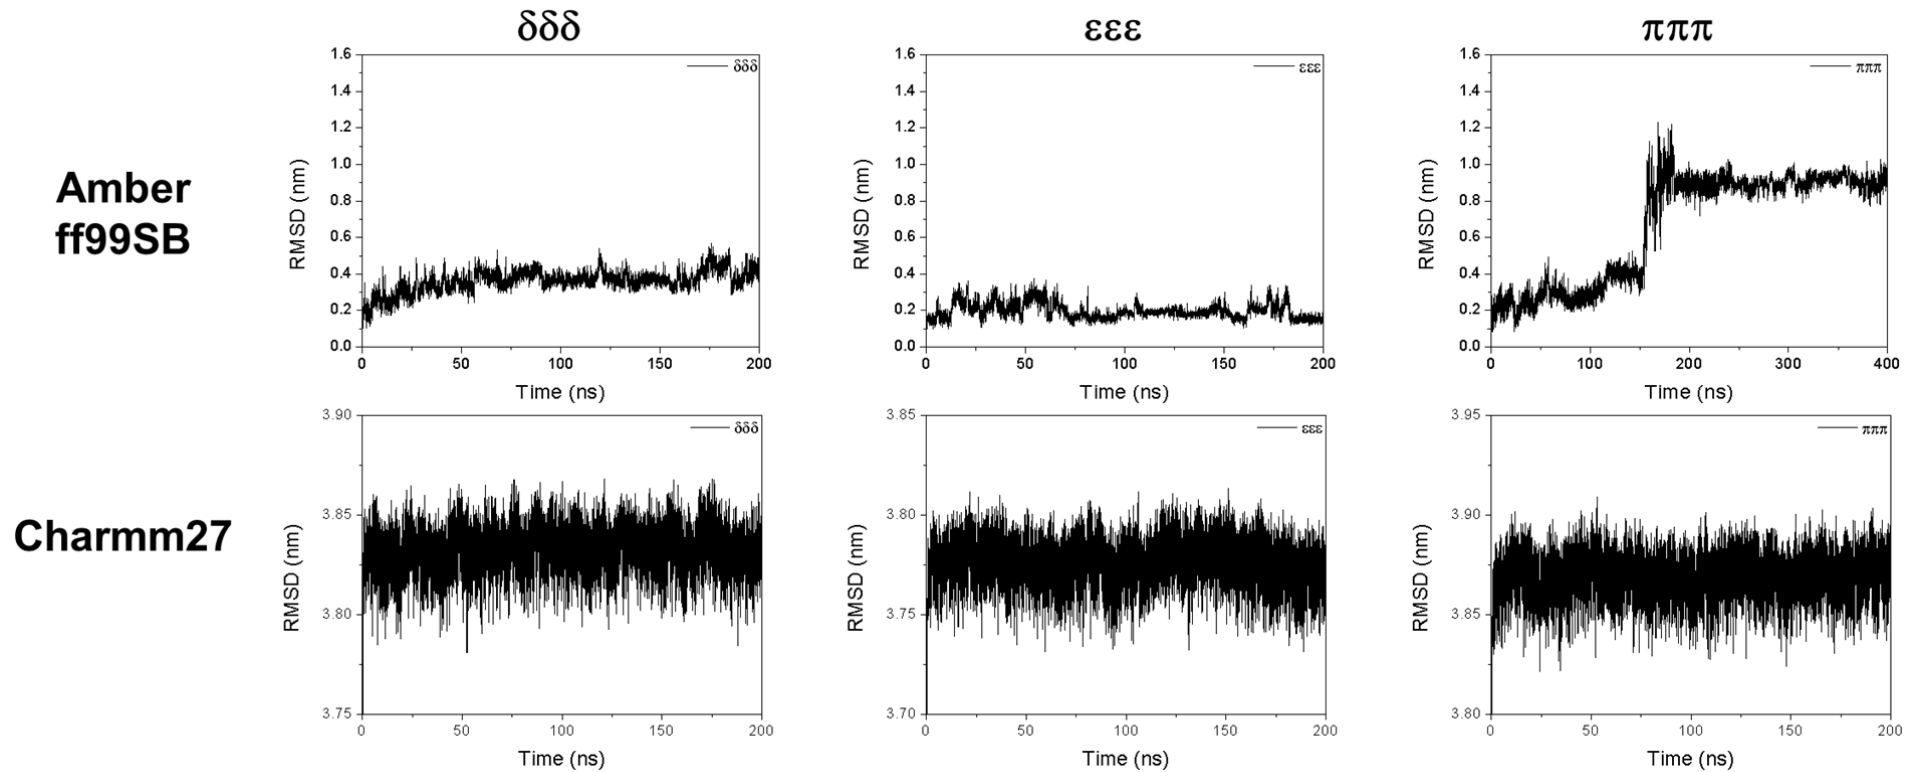

**Figure S1.** Root mean square deviation (RMSD) of the  $\delta\delta\delta$ ,  $\epsilon\epsilon\epsilon$ , and  $\pi\pi\pi$  tautomers calculated with Amber ff99SB and Charmm27 force field.

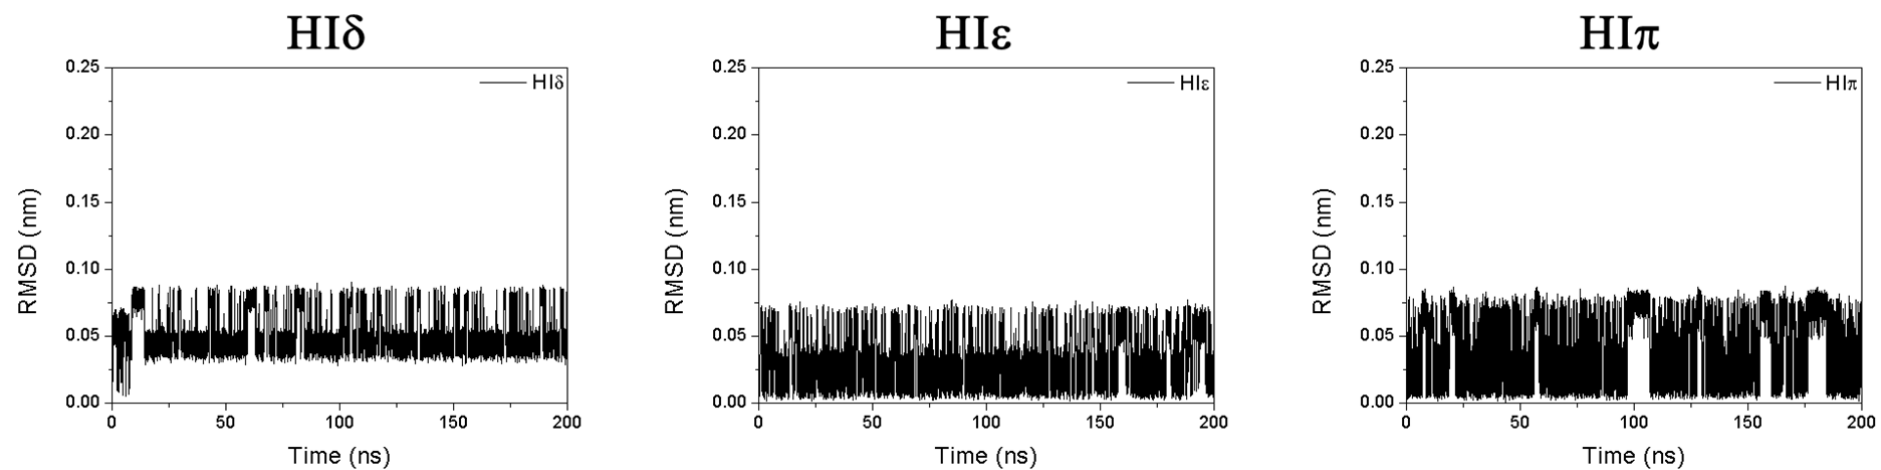

**Figure S2.** Root mean square deviation (RMSD) of the  $\text{HI}\delta$ ,  $\text{HI}\epsilon$ , and  $\text{HI}\pi$  dipeptides calculated with Amber ff99SB force field.

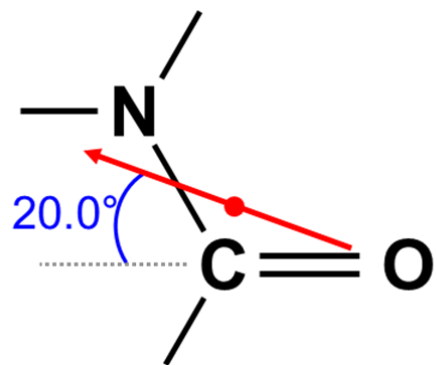

**Figure S3.** Schematic drawing of the location (red circle) and direction (red arrow) of the transition dipole used in this study.







**Table S2.** The Amide-I Vibrational Frequency of the HI $\delta$ , HI $\epsilon$  and HI $\pi$  for Histidine Residue, Histidine Residue with Solvent, and Dipeptide System Calculated with MP2/6-31G\*\*.

|                                         | HI $\delta$ | HI $\epsilon$ | HI $\pi$ |
|-----------------------------------------|-------------|---------------|----------|
| Histidine residue                       | 1736.303    | 1726.933      | 1738.286 |
| Histidine residue with implicit solvent | 1721.418    | 1712.814      | 1712.108 |
| Dipeptide (labeled)                     | 1687.192    | 1691.288      | 1667.768 |
| Dipeptide (non-labeled)                 | 1767.503    | 1762.266      | 1758.551 |

**Table S3.** The Number of Hydrogen Bonds within 0.35 nm from amide-I bond for C/N-terminus Amide-I Bond for the HI $\delta$ , HI $\epsilon$  and HI $\pi$  Tautomers.

| C-terminus amide-I bond |               |          |
|-------------------------|---------------|----------|
| HI $\delta$             | HI $\epsilon$ | HI $\pi$ |
| 2.967                   | 2.054         | 2.533    |
| N-terminus amide-I bond |               |          |
| HI $\delta$             | HI $\epsilon$ | HI $\pi$ |
| 3.413                   | 3.450         | 3.109    |

**Table S4.** The atomic charge of C and O atom for C-terminus and N-terminus amide-I bonds based on AMBERff99SB force field.

| Atom type     |   | C-terminus   | N-terminus   |
|---------------|---|--------------|--------------|
|               |   | Amide-I bond | Amide-I bond |
| HI $\delta$   | C | 0.5973       | 0.5972       |
|               | O | -0.5679      | -0.5679      |
| HI $\epsilon$ | C | 0.5973       | 0.5972       |
|               | O | -0.5679      | -0.5679      |
| HI $\pi$      | C | 0.7341       | 0.5972       |
|               | O | -0.5894      | -0.5679      |

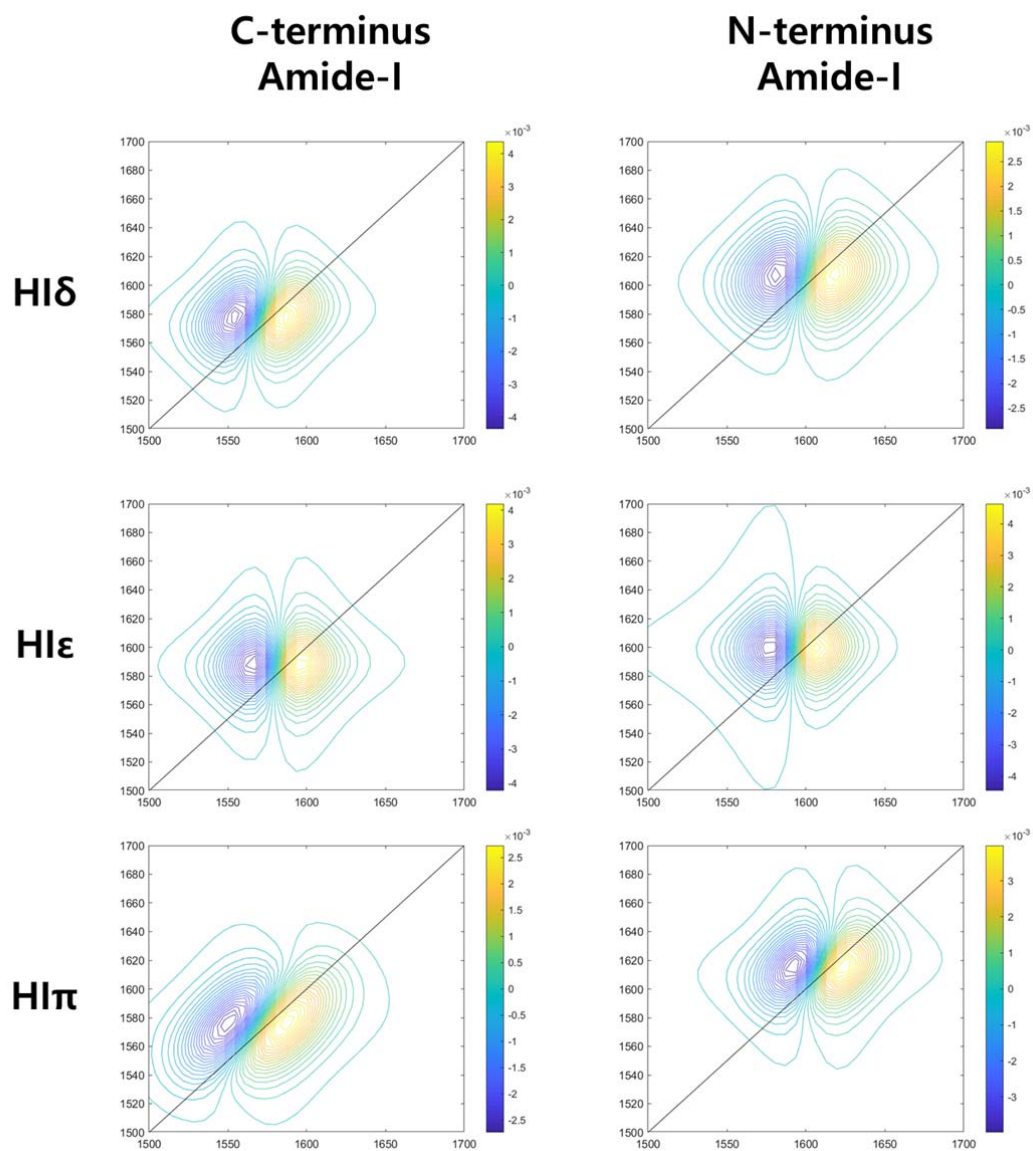

**Figure S4.** 2DIR spectra for amide-I vibration of HI $\delta$ , HI $\epsilon$ , and HI $\pi$  dipeptides: C-terminus (left) and N-terminus (right) amide bond at waiting time,  $t_2 = 3$  ps.
